# Supplementary material for: Use of Compartmental Modeling and Retinol Isotope Dilution to Determine Vitamin A Stores in Young People with Sickle Cell Disease Before and After Vitamin A Supplementation
Source: PubMed Central journal article supplement — J Nutr. 2023 Jul 17;153(9):2762–71. doi: 10.1016/j.tjnut.2023.07.004 (PMC10517228; doi:10.1016/j.tjnut.2023.07.004), 2023-07-17
Supplement: mmc1.pdf [file mmc1.pdf]

# Online Supplementary Material for Ford et al., “Use of Compartmental Modeling and Retinol Isotope Dilution to Determine Vitamin A Stores in Young People with Sickle Cell Disease Before and After Vitamin A Supplementation”

## Supplemental Methods

### Adjusting plasma retinol fraction of dose

To obtain the most representative central tendency for the group composite data on  $FD_p$  for modeling, we adjusted (normalized) each individual's values for  $FD_p$  in samples collected later than 3 d postdosing based on their position relative to the geometric mean at 3 d. Specifically, for each subject, we calculated a 3 d ratio using the equation:

$$3 \text{ d ratio}_{(i)} = \text{geometric mean } FD_p \text{ at 3 d} / FD_{p(i)} \text{ at 3 d}$$

where  $i$  is the  $i^{\text{th}}$  subject. Then, we multiplied each subject's  $FD_p$  at post-3 d times by the 3 d ratio using the equation:

$$\text{Adjusted } FD_{p(i)} = 3 \text{ d ratio}_{(i)} \times \text{post-3 d } FD_{p(i)}$$

The composite super-subject dataset was defined as the geometric mean  $FD_p$  at each time, including adjusted  $FD_p$  values at all sampling times after 3 d.

**Online Supplementary Material for Ford et al., “Use of Compartmental Modeling and Retinol Isotope Dilution to Determine Vitamin A Stores in Young People with Sickle Cell Disease Before and After Vitamin A Supplementation”**

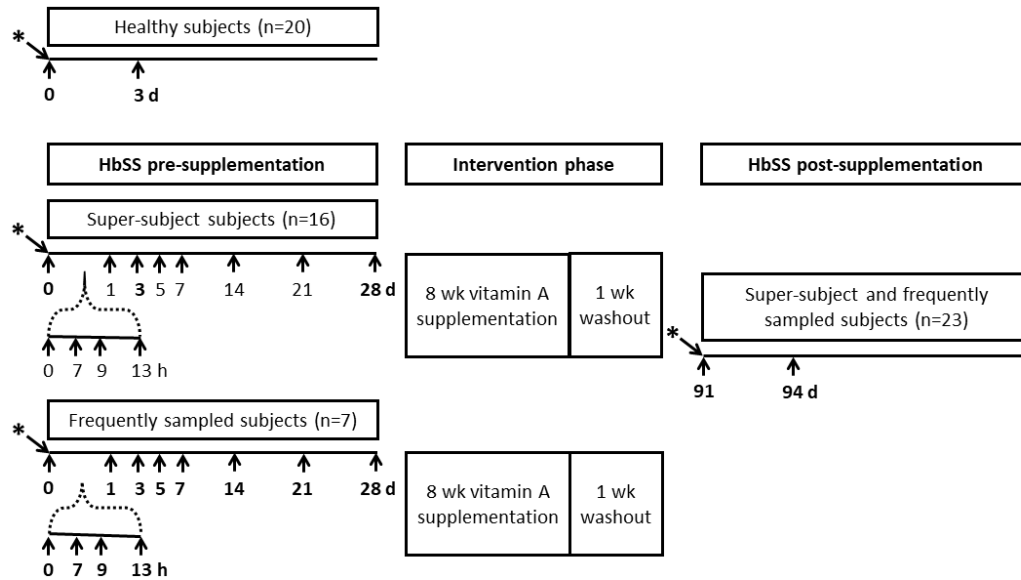

**Supplemental Figure 1** Study design and blood sampling schedule. Healthy subjects were sampled at baseline and 3 d after dosing; SCD-HbSS super-subject participants were sampled before supplementation at baseline and at 3 d after dosing and at one additional time; after the intervention phase, they were sampled at baseline and 3 d post-dose; frequently sampled subjects were sampled at all times indicated from 0 to 28 d post-dose. The asterisk (\*) represents the time that the oral [<sup>13</sup>C<sub>10</sub>]retinyl acetate dose was administered; times indicated in bold show when blood samples were collected from all subjects in the specified group. SCD-HbSS, sickle cell disease hemoglobin SS type.

Online Supplementary Material for Ford et al., “Use of Compartmental Modeling and Retinol Isotope Dilution to Determine Vitamin A Stores in Young People with Sickle Cell Disease Before and After Vitamin A Supplementation”

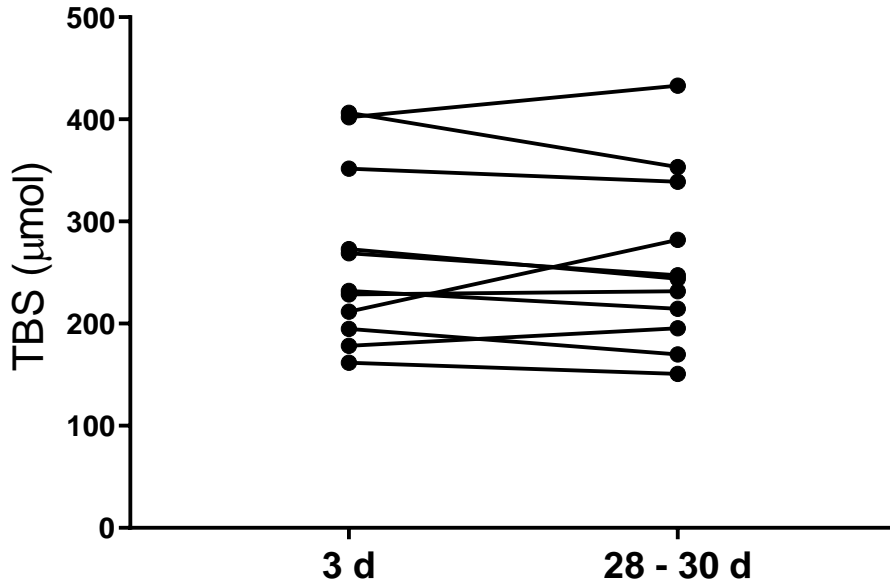

**Supplemental Figure 2** Paired predictions for TBS calculated by RID at 3 d and at later times for a subgroup (n=11) of young people with SCD-HbSS before supplementation. Symbols show TBS predicted for individual subjects and lines indicate their paired predictions at the 2 times. Later times were 28 d for 8 subjects and 29 or 30 d for 2 others. Values were calculated using Equation 1 (see Methods) with group values for the equation’s composite coefficient  $FaS$  calculated by modeling the super-subject dataset along with each subject’s  $SA_p$  at the corresponding time. Model-predicted values for  $FaS$  used in these calculations were 2.40 at 3 d (n=11), 0.622 at 28 d (n=9), 0.618 at 29 d (n=1), and 0.614 at 30 d (n=1). Based on paired comparisons, TBS predictions were not significantly different at 3 d versus the later times. The geometric mean TBS for this subgroup of SCD-HbSS subjects was 252 µmol (range, 162–406 µmol) at 3 d and 248 µmol (range, 151–433 µmol) at 28 d. RID, retinol isotope dilution;  $SA_p$ , retinol specific activity in plasma; SCD-HbSS, sickle cell disease hemoglobin SS type; TBS, vitamin A total body stores.



**Online Supplementary Material for Ford et al., "Use of Compartmental Modeling and Retinol Isotope Dilution to Determine Vitamin A Stores in Young People with Sickle Cell Disease Before and After Vitamin A Supplementation"**

|     |             |             |           |
|-----|-------------|-------------|-----------|
|     | 0.383482966 | 0.043957318 |           |
|     | 0.529109414 | 0.06960207  |           |
|     | 1.042291763 | 0.070569    |           |
| 105 |             |             | FSD=0.025 |
|     | 2.998148553 | 0.014841528 |           |
| 105 |             |             | FSD=0.05  |
|     | 5.033566367 | 0.009483225 |           |
|     | 7.023935806 | 0.007910541 |           |
|     | 14.16594578 | 0.004449613 |           |
|     | 21.44515146 | 0.004123146 |           |
|     | 28.32947454 | 0.004377299 |           |

CC COMPARTMENT SIMULATIONS

|     |     |    |
|-----|-----|----|
| 104 | 0.0 |    |
| 2   | 0.1 | 50 |
| 2   | 1.0 | 23 |
| 2   | 10  | 7  |
| 105 | 0.0 |    |
| 2   | 0.1 | 50 |
| 2   | 1.0 | 23 |
| 2   | 10  | 7  |
| 106 | 0.0 |    |
| 2   | 0.1 | 50 |
| 2   | 1.0 | 23 |
| 2   | 10  | 7  |
| 107 | 0.0 |    |
| 2   | 0.1 | 50 |
| 2   | 1.0 | 23 |
| 2   | 10  | 7  |
| 114 | 0.0 |    |
| 2   | 0.1 | 50 |
| 2   | 1.0 | 23 |
| 2   | 10  | 7  |
| 115 | 0.0 |    |
| 2   | 0.1 | 50 |
| 2   | 1.0 | 23 |
| 2   | 10  | 7  |
| 116 | 0.0 |    |
| 2   | 0.1 | 50 |
| 2   | 1.0 | 23 |
| 2   | 10  | 7  |
| 117 | 0.0 |    |
| 2   | 0.1 | 50 |
| 2   | 1.0 | 23 |
| 2   | 10  | 7  |

CC S FOR COMP 6 + 7  
125G (25)

**Online Supplementary Material for Ford et al., “Use of Compartmental Modeling and Retinol Isotope Dilution to Determine Vitamin A Stores in Young People with Sickle Cell Disease Before and After Vitamin A Supplementation”**

$$XG(25) = (F(5) / F(15)) / ((F(6) + F(7)) / (F(16) + F(17)))$$

|   |     |    |
|---|-----|----|
|   | 1.0 |    |
| 2 | 0.5 | 18 |
| 2 | 1.0 | 18 |
| 2 | 10  | 7  |

CC Fa\*S

126G(26)

$$XG(26) = (F(6) + F(7)) * G(25)$$

|   |     |    |
|---|-----|----|
|   | 1.0 |    |
| 2 | 0.5 | 18 |
| 2 | 1.0 | 18 |
| 2 | 10  | 7  |
